# Supplementary material for: Effectiveness and Safety of a Shorter Treatment Regimen in a Setting with a High Burden of Multidrug-Resistant Tuberculosis
Source: MDPI journal article supplement (doi:10.3390/ijerph18084121), 2021-04-13
Supplement: s1 [file s1]

**Table S1:** Composition and dosing of standard STR regimen in Uzbekistan

| Drug                           | Daily dose                                                                                                                 | Weight range |         |         |         |         |        |
|--------------------------------|----------------------------------------------------------------------------------------------------------------------------|--------------|---------|---------|---------|---------|--------|
|                                |                                                                                                                            | 30-35kg      | 36-45kg | 46-55kg | 56-70kg | >70kg   |        |
| <b>High dose isoniazid (H)</b> | <b>10mg/kg once daily</b>                                                                                                  | 300mg        | 400mg   | 500mg   | 600mg   | 600mg   |        |
| Pyrazinamide (Z)               | 20-30 mg/kg once daily                                                                                                     | 800mg        | 1000mg  | 1200mg  | 1600mg  | 2000mg  |        |
| Ethambutol (E)                 | 15-25 mg/kg once daily                                                                                                     | 600mg        | 800mg   | 1000mg  | 1200mg  | 1200mg  |        |
| Moxifloxacin (Mfx)             | 400 mg once daily                                                                                                          | 400mg        | 400mg   | 400mg   | 400mg   | 400mg   |        |
| Protionamide (Pto)             | 500-750 mg once daily                                                                                                      | 500mg        | 500mg   | 500mg   | 750mg   | 750mg   |        |
| Clofazimine (Cfz)              | 200-300mg daily (during the first two months of treatment) then dose reduced up to 100mg daily (alternatively 100mg daily) |              |         |         |         |         |        |
|                                |                                                                                                                            | 30-33kg      | 34-40kg | 41-45kg | 46-50kg | 51-70kg | >70kg  |
| Capreomycin (Cm)<br>or         | 15-20mg/kg once daily                                                                                                      | 500mg        | 600mg   | 750mg   | 800mg   | 1000mg  | 1000mg |
| Kanamycin (Km)                 | 15-20mg/kg once daily                                                                                                      | 500mg        | 625mg   | 750mg   | 875mg   | 1000mg  | 1000mg |

**Table S2.** Definition of treatment outcome.

|                      |                                                                                                                                                                                                                                                                                                                                                                    |
|----------------------|--------------------------------------------------------------------------------------------------------------------------------------------------------------------------------------------------------------------------------------------------------------------------------------------------------------------------------------------------------------------|
| <b>Cure</b>          | <b>A patient with bacteriologically confirmed RR-TB who has completed treatment without evidence of failure AND at least three or more consecutive cultures taken at least 30 days apart are negative at the end of treatment.</b>                                                                                                                                 |
| Treatment completion | Treatment completed without evidence of failure BUT no record that three or more consecutive cultures taken at least 30 days apart are negative at the end of treatment                                                                                                                                                                                            |
| Treatment success    | “Cured” or “Treatment completed” (=treatment success) without recurrence over the 12-month follow-up period.                                                                                                                                                                                                                                                       |
| Failure              | Patient fails to show culture negative by the end of month 6 of prolonged intensive phase; or Culture reversion during the continuation phase; or amplification of resistance with either ofloxacin, capreomycin, or kanamycin resistance; or adverse drug reactions (leading to permanent termination or the change of at least two anti-TB drugs in the regimen) |
| Died                 | A patient who dies for any reason during the course of treatment                                                                                                                                                                                                                                                                                                   |
| Lost to follow-up    | Interruption of treatment for $\geq 2$ consecutive months without medical approval and not meeting criteria for failure                                                                                                                                                                                                                                            |
| Not evaluated        | A patient for whom no treatment outcome is assigned (this includes patients “transferred out” to another treatment unit and whose treatment outcome is unknown)                                                                                                                                                                                                    |
| Reoccurrence         | An episode of TB which occurred during the 12-month follow-up period after cure or treatment completion with two consecutive positive cultures, or one positive culture with clinical signs and symptoms or radiographic deterioration.                                                                                                                            |
